# Supplementary material for: Spatial Variation in Soil Base Saturation and Exchangeable Cations in Tropical and Subtropical China
Source: MDPI journal article supplement (doi:10.3390/agronomy13030781), 2023-03-08
Supplement: s1 [file s1]

# Supplementary Materials

## 1. Supplementary Tables

**Table S1.** The Chinese Soil Taxonomy's classifications of soil and roughly equal WRB classifications.

| Chinese Soil Taxonomy | WRB                                             |
|-----------------------|-------------------------------------------------|
| Anthrosols            | Anthrosols                                      |
| Ferrosols             | Acrisols/Lixisols/Plinthosols/Nitisols          |
| Argosols              | Luvisols/Alisols                                |
| Cambosols             | Cambisols                                       |
| Primosols             | Fluvisols/Leptisols/Arenosols/Regosols/Cryosols |

**Table S2.** The number of sampling points for exchangeable base cations under different land-use types.

| Soil properties <sup>a)</sup> | Depth     | Forest | Garden | Paddy field | Upland |
|-------------------------------|-----------|--------|--------|-------------|--------|
| Exch. Ca                      | 0-20 cm   | 282    | 48     | 255         | 142    |
| (cmol(+))kg <sup>-1</sup>     | 20-50 cm  | 278    | 47     | 248         | 139    |
|                               | 50-100 cm | 261    | 45     | 241         | 125    |
| Exch. Mg                      | 0-20 cm   | 280    | 50     | 263         | 143    |
| (cmol(+))kg <sup>-1</sup>     | 20-50 cm  | 277    | 47     | 257         | 139    |
|                               | 50-100 cm | 263    | 46     | 244         | 128    |
| Exch. K                       | 0-20 cm   | 283    | 48     | 263         | 145    |
| (cmol(+))kg <sup>-1</sup>     | 20-50 cm  | 279    | 47     | 259         | 144    |
|                               | 50-100 cm | 260    | 47     | 248         | 131    |
| Exch. Na                      | 0-20 cm   | 277    | 51     | 254         | 142    |
| (cmol(+))kg <sup>-1</sup>     | 20-50 cm  | 273    | 49     | 246         | 140    |
|                               | 50-100 cm | 257    | 47     | 238         | 128    |

<sup>a)</sup> Exch. Ca: exchangeable Ca<sup>2+</sup>; Exch. Mg: exchangeable Mg<sup>2+</sup>; Exch. K: exchangeable K<sup>+</sup>; Exch. Na: exchangeable Na<sup>+</sup>.

**Table S3.** The number of sampling points for exchangeable acidic cations and BSP under different land-use types.

| Soil properties <sup>a)</sup> | Depth     | Forest | Garden | Grassland | Paddy field | Upland |
|-------------------------------|-----------|--------|--------|-----------|-------------|--------|
| Exch. H                       | 0-20 cm   | 348    | 84     | 50        | 194         | 143    |
| (cmol(+)kg <sup>-1</sup> )    | 20-50 cm  | 344    | 81     | 46        | 179         | 135    |
|                               | 50-100 cm | 326    | 79     | 43        | 152         | 122    |
| Exch. Al                      | 0-20 cm   | 360    | 85     | 49        | 198         | 143    |
| (cmol(+)kg <sup>-1</sup> )    | 20-50 cm  | 355    | 84     | 47        | 184         | 136    |
|                               | 50-100 cm | 330    | 80     | 43        | 160         | 123    |
| BSP                           | 0-20 cm   | 380    | 78     | 60        | 307         | 228    |
| (%)                           | 20-50 cm  | 374    | 78     | 51        | 294         | 225    |
|                               | 50-100 cm | 352    | 76     | 47        | 275         | 209    |

<sup>a)</sup> Exch. H: exchangeable H<sup>+</sup>; Exch. Al: exchangeable Al<sup>3+</sup>; BSP: base saturation percentage.

**Table S4.** The number of sampling points for exchangeable base cations under different soil types.

| Soil properties            | Depth     | Anthrosols | Argosols | Cambosols | Ferrosols |
|----------------------------|-----------|------------|----------|-----------|-----------|
| Exch. Ca                   | 0-20 cm   | 240        | 128      | 229       | 116       |
| (cmol(+)kg <sup>-1</sup> ) | 20-50 cm  | 234        | 124      | 224       | 116       |
|                            | 50-100 cm | 228        | 122      | 200       | 115       |
| Exch. Mg                   | 0-20 cm   | 250        | 132      | 234       | 116       |
| (cmol(+)kg <sup>-1</sup> ) | 20-50 cm  | 246        | 130      | 230       | 116       |
|                            | 50-100 cm | 240        | 127      | 206       | 115       |
| Exch. K                    | 0-20 cm   | 247        | 129      | 232       | 115       |
| (cmol(+)kg <sup>-1</sup> ) | 20-50 cm  | 245        | 127      | 227       | 114       |
|                            | 50-100 cm | 236        | 124      | 203       | 113       |
| Exch. Na                   | 0-20 cm   | 242        | 128      | 224       | 115       |
| (cmol(+)kg <sup>-1</sup> ) | 20-50 cm  | 234        | 126      | 218       | 114       |
|                            | 50-100 cm | 227        | 124      | 196       | 112       |

**Table S5.** The number of sampling points for exchangeable acidic cations and BSP under different soil types.

| Soil properties             | Depth     | Anthrosols | Argosols | Cambosols | Ferrosols | Primosols |
|-----------------------------|-----------|------------|----------|-----------|-----------|-----------|
| Exch. H                     | 0-20 cm   | 192        | 170      | 287       | 129       | 47        |
| (cmol(+))kg <sup>-1</sup> ) | 20-50 cm  | 177        | 164      | 282       | 127       | 35        |
|                             | 50-100 cm | 152        | 161      | 254       | 128       | 25        |
| Exch. Al                    | 0-20 cm   | 196        | 173      | 296       | 130       | 46        |
| (cmol(+))kg <sup>-1</sup> ) | 20-50 cm  | 182        | 170      | 288       | 130       | 36        |
|                             | 50-100 cm | 160        | 164      | 255       | 130       | 23        |
| BSP                         | 0-20 cm   | 291        | 208      | 343       | 159       | 61        |
| (%)                         | 20-50 cm  | 281        | 205      | 339       | 159       | 42        |
|                             | 50-100 cm | 263        | 204      | 306       | 158       | 32        |

## 2. Supplementary Figures

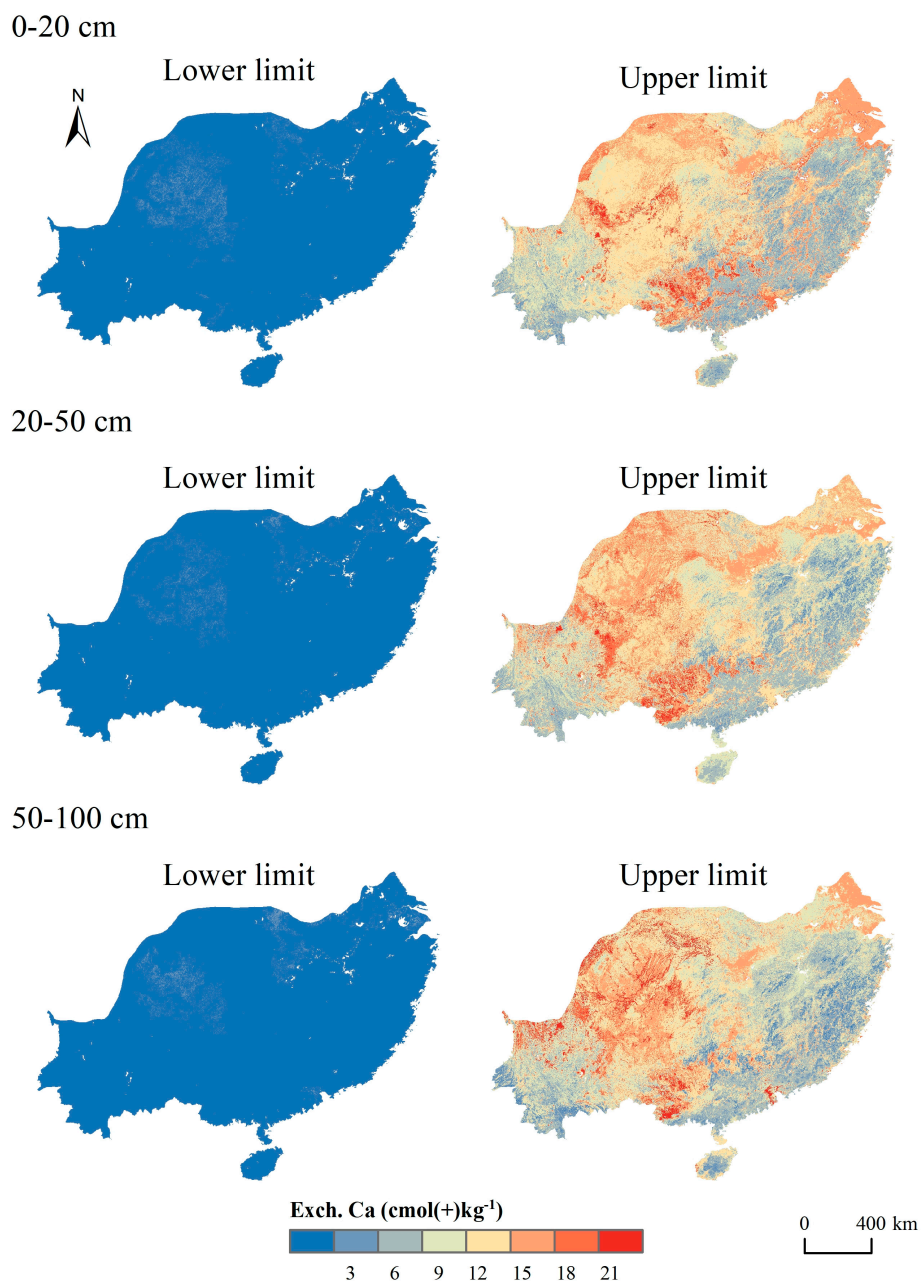

**Figure S1.** Maps of lower and upper limits of 90% prediction interval of Exch. Ca at soil depths of 0-20 cm, 20-50 cm and 50-100 cm.



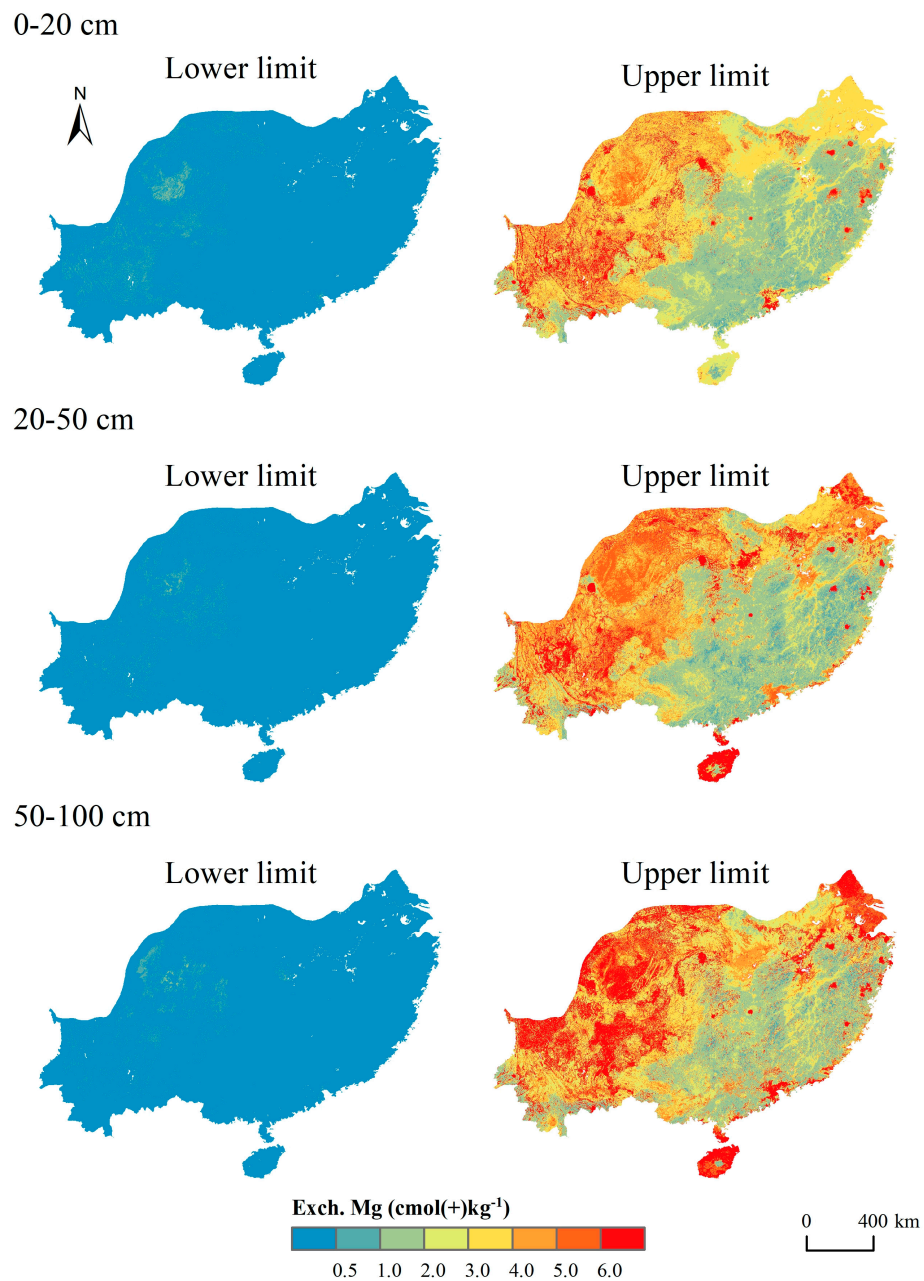

**Figure S2.** Maps of lower and upper limits of 90% prediction interval of Exch. Mg at soil depths of 0-20 cm, 20-50 cm and 50-100 cm.

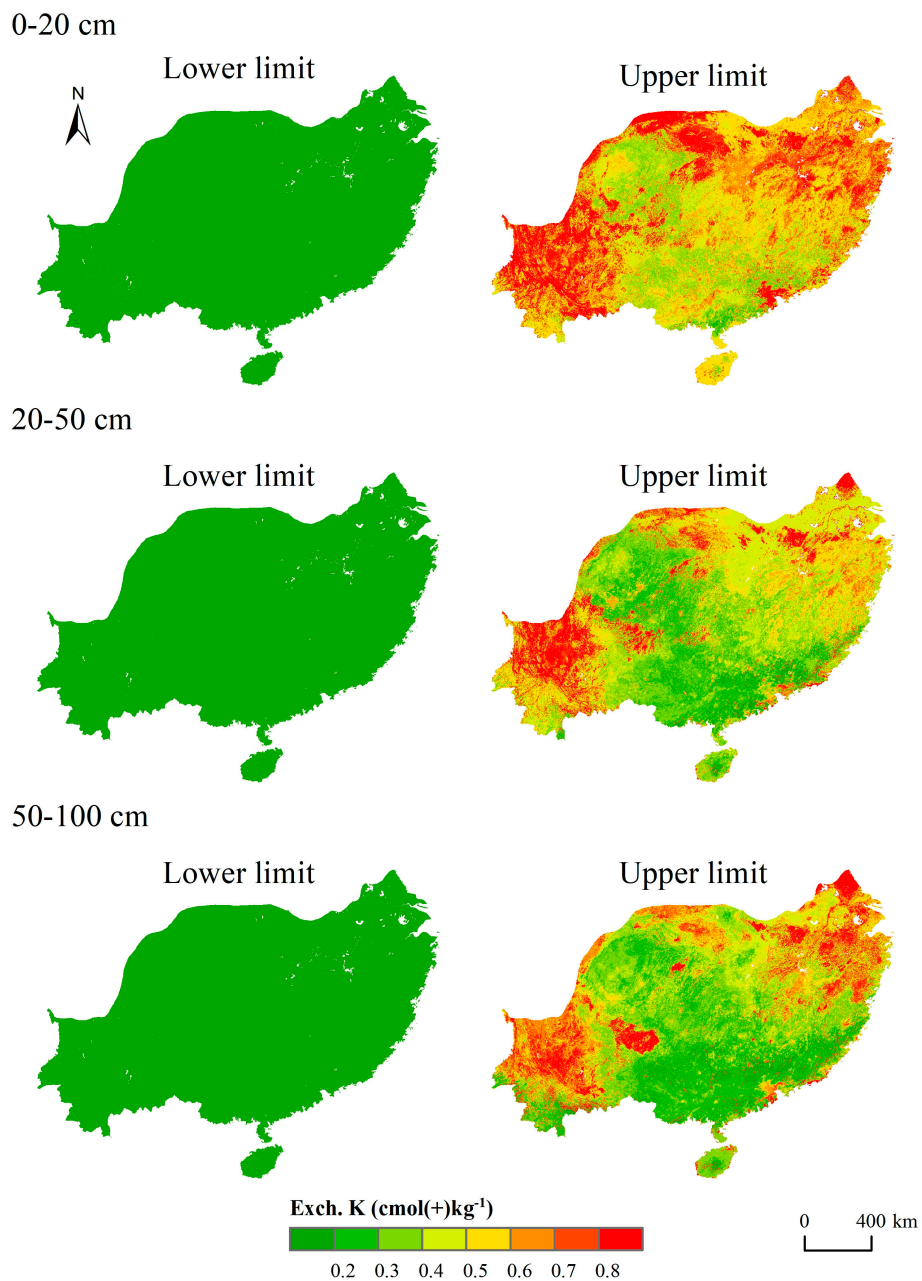

**Figure S3.** Maps of lower and upper limits of 90% prediction interval of Exch. K at soil depths of 0-20 cm, 20-50 cm and 50-100 cm.

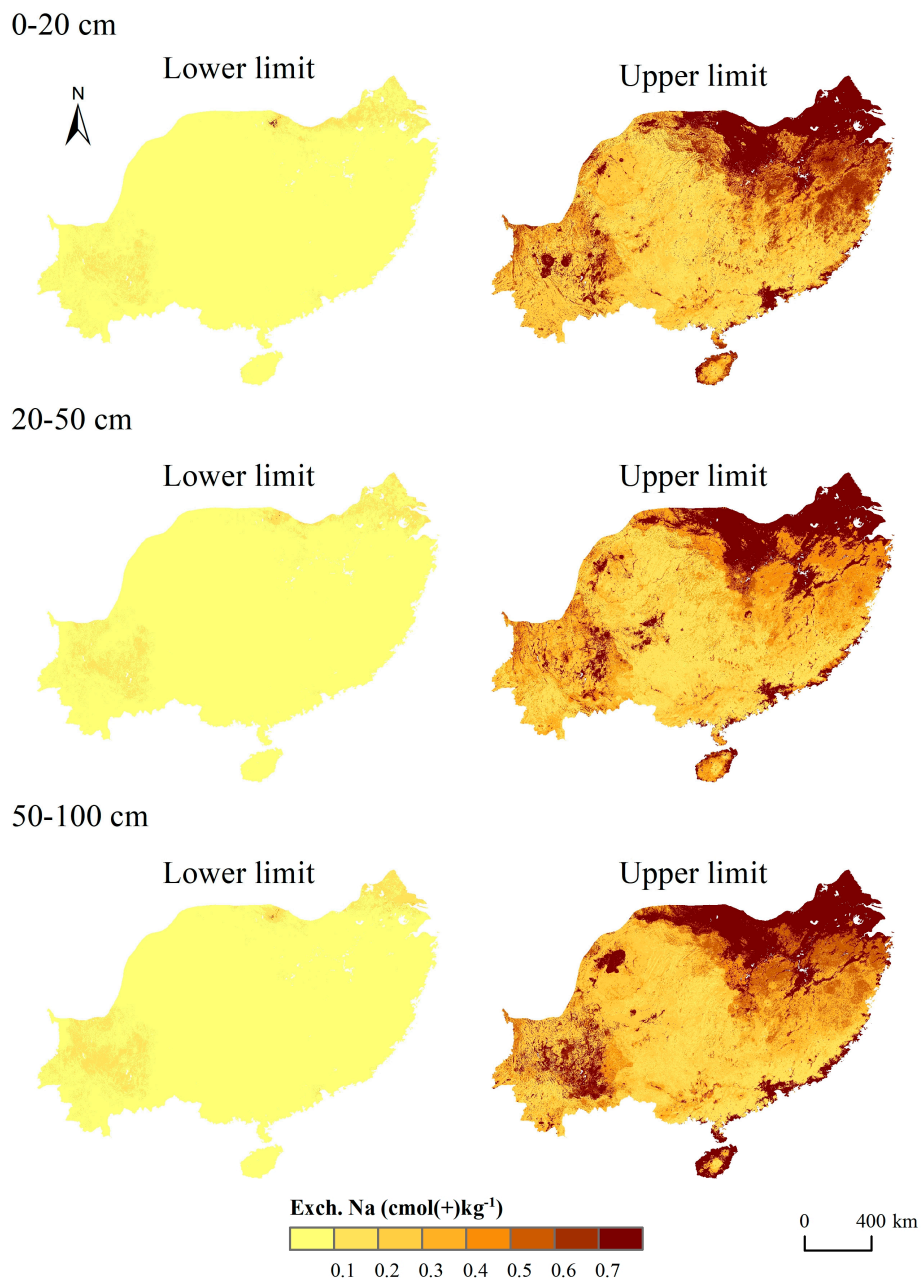

**Figure S4.** Maps of lower and upper limits of 90% prediction interval of Exch. Na at soil depths of 0-20 cm, 20-50 cm and 50-100 cm.

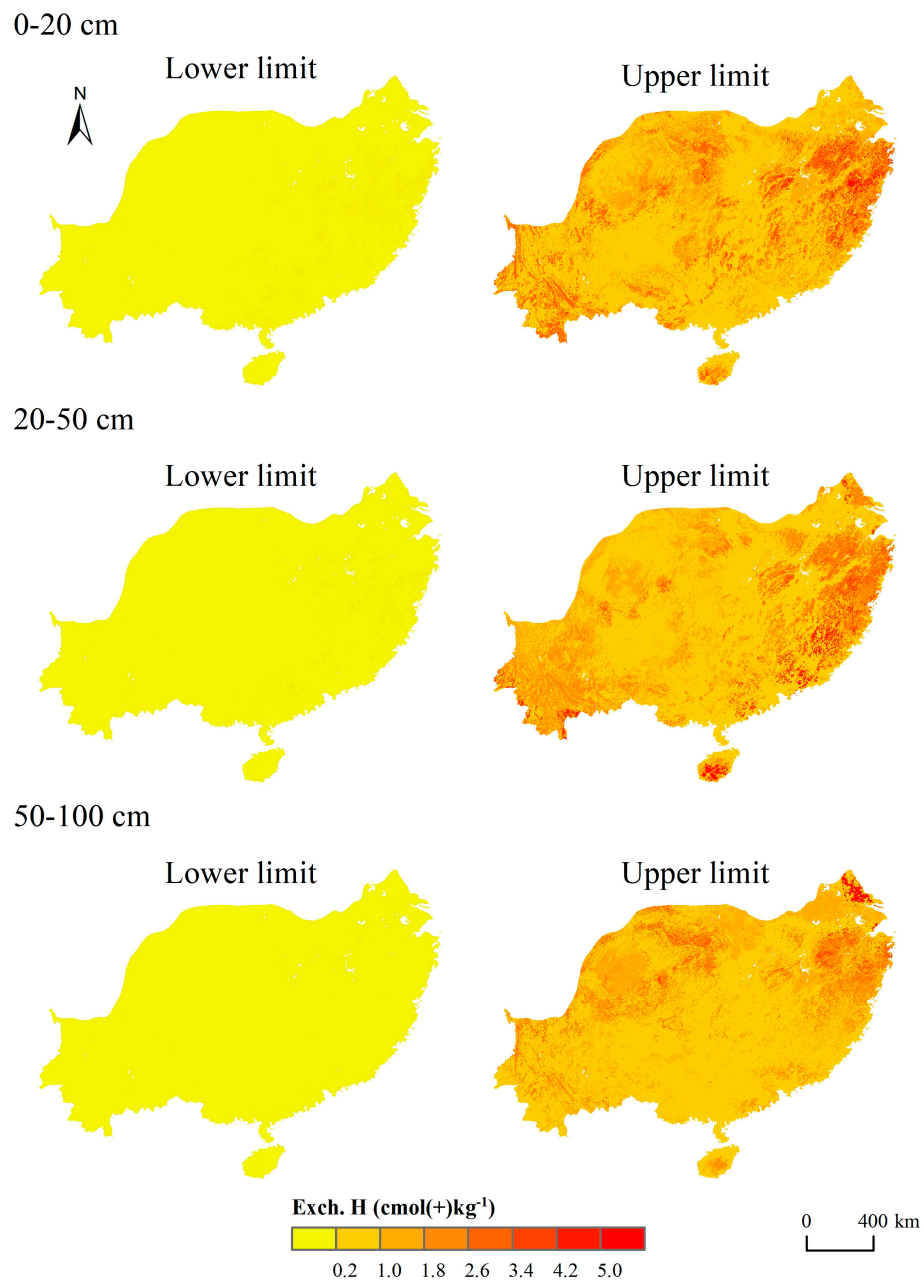

**Figure S5.** Maps of lower and upper limits of 90% prediction interval of Exch. H at soil depths of 0-20 cm, 20-50 cm and 50-100 cm.

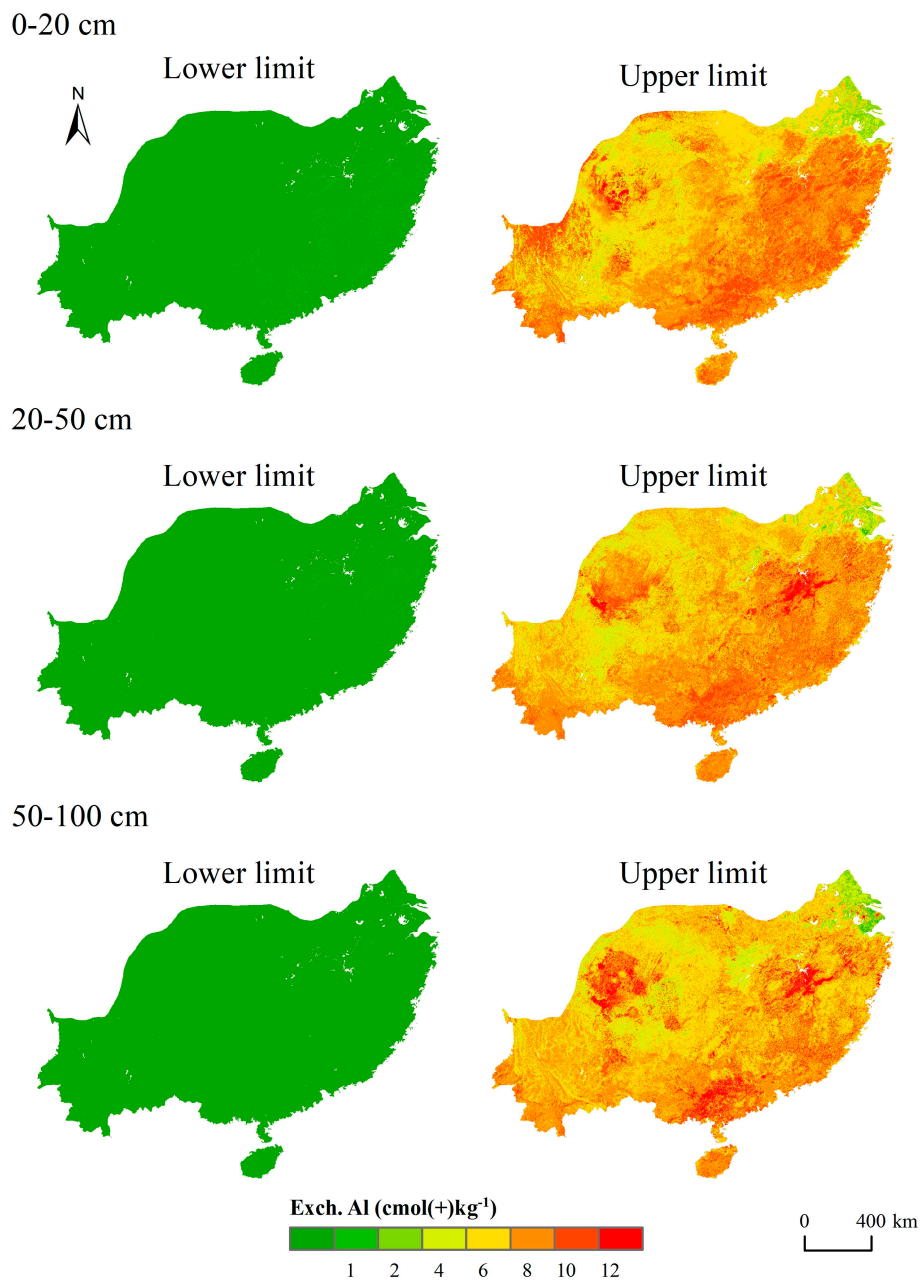

**Figure S6.** Maps of lower and upper limits of 90% prediction interval of Exch. Al at soil depths of 0-20 cm, 20-50 cm and 50-100 cm.



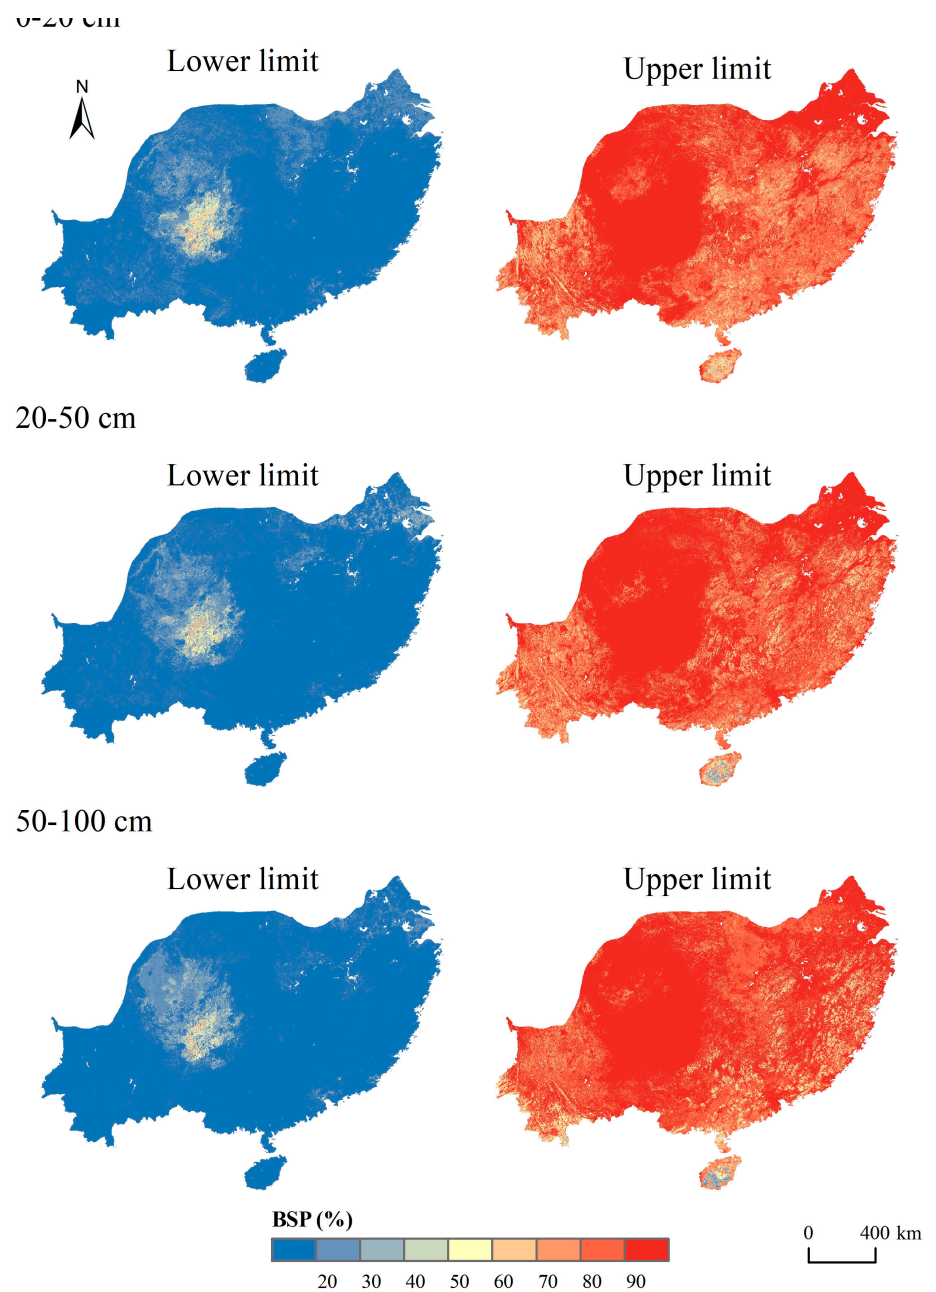

**Figure S7.** Maps of lower and upper limits of 90% prediction interval of BSP at soil depths of 0-20 cm, 20-50 cm and 50-100 cm.
